# Supplementary material for: Local governments’ green development attention, corporate active environmental investments, and the economic consequences: evidence from China
Source: Research Square preprint supplement (doi:10.21203/rs.3.rs-6291893/v1), 2025-05-07
Supplement: Supplementary file 1 [file 74dd0cb04b09826e668dd869.docx]

**Appendix A Variable definition.**

| **Type** | **Variable Name** | **Symbol** | **Variable Definition** |
| --- | --- | --- | --- |
| Dependent Variables | Corporate Active Environmental Investment (CAEI) | *ACT_ENVI* | Logarithm of the company’s environmental investment exceeding the industry median in that year. |
| Environmental Subsidy | *E_SUBSIDY* | Natural logarithm of the environmental subsidy provided to the company by the government. |
| Effective Tax Rate | *EFF_TAX* | Ratio of income tax expenses to pre-tax profits. |
| Financing Constraints | *KZ* | Calculation method: financing constraint = -6.315 × net cash flow from operating activities/total assets at the beginning of the year + 0.460 × Tobin’s Q value + 3.291 × total liabilities at year-end/total assets at the beginning of the year - 39.356 × cash paid for dividends, profits, or interest payments/total assets at the beginning of the year - 3.949 × ending balance of cash and cash equivalents/total assets at the beginning of the year. |
| Independent Variable | Government Green Development Attention (GDA) | *ATTEN_ENVI* | Proportion of the number of words discussing environmental issues in government work reports to the total number of words in the reports. |
| Control Variables | Corporate Size | *SIZE* | Natural logarithm of total assets. |
| Profitability | *ROA* | Ratio of net profit to total assets. |
| Financial Leverage | *LEV* | Ratio of total liabilities to total assets. |
| Shareholding of Largest Shareholder | *TOP1* | Ratio of shares held by the largest shareholder to total shares outstanding. |
| Asset Turnover Ratio | *TAT* | Ratio of operating revenue to total assets. |
| Growth Ability | *GROWTH* | Calculation method: growth ability = (operating revenue - operating revenue from the previous year)/operating revenue from the previous year. |
| Moderating Variables | Ownership Nature | *SOE* | Whether the corporation is state-owned in the current year: 1 if yes, 0 if no. |
| Heavy Polluting Nature | *POLLUTED* | Whether the corporation belongs to an industry listed in the 2008 Environmental Inspection Industry Classification Management Directory that requires environmental inspections: 1 if yes, 0 if no. |
| Mayor Change | *MAYOR* | Whether the corporation’s city mayor is in their first or second year in office: 1 if yes, 0 if no. |

**Appendix B Sample distribution by industry and year.**

| **Industry** | **Frequency** | **Percent** |  | **Year** | **Frequency** | **Percent** |
| --- | --- | --- | --- | --- | --- | --- |
| A | 370 | 1.180 |  | 2007 | 903 | 2.880 |
| B | 595 | 1.900 |  | 2008 | 994 | 3.170 |
| C1 | 1,952 | 6.220 |  | 2009 | 1,031 | 3.280 |
| C2 | 6,085 | 19.38 |  | 2010 | 1,327 | 4.230 |
| C3 | 12,200 | 38.86 |  | 2011 | 1,553 | 4.950 |
| C4 | 724 | 2.310 |  | 2012 | 1,676 | 5.340 |
| D | 945 | 3.010 |  | 2013 | 1,700 | 5.420 |
| E | 712 | 2.270 |  | 2014 | 1,725 | 5.490 |
| F | 1,420 | 4.520 |  | 2015 | 1,832 | 5.840 |
| G | 796 | 2.540 |  | 2016 | 1,999 | 6.370 |
| H | 116 | 0.370 |  | 2017 | 2,302 | 7.330 |
| I | 2,316 | 7.380 |  | 2018 | 2,456 | 7.820 |
| K | 1,103 | 3.510 |  | 2019 | 2,564 | 8.170 |
| L | 398 | 1.270 |  | 2020 | 2,766 | 8.810 |
| M | 409 | 1.300 |  | 2021 | 3,153 | 10.04 |
| N | 420 | 1.340 |  | 2022 | 3,412 | 10.87 |
| O | 42 | 0.130 |  |  |  |  |
| P | 27 | 0.0900 |  |  |  |  |
| Q | 68 | 0.220 |  |  |  |  |
| R | 374 | 1.190 |  |  |  |  |
| S | 321 | 1.020 |  |  |  |  |
| Total | 31,393 | 100 |  | Total | 31,393 | 100 |
